# Supplementary material for: Novel Insights into Redox-Based Mechanisms for Auranofin-Induced Rapid Cancer Cell Death
Source: MDPI journal article supplement (doi:10.3390/cancers14194864), 2022-10-05
Supplement: s1 [file Figure S2.pdf › Figure S2.pdf]

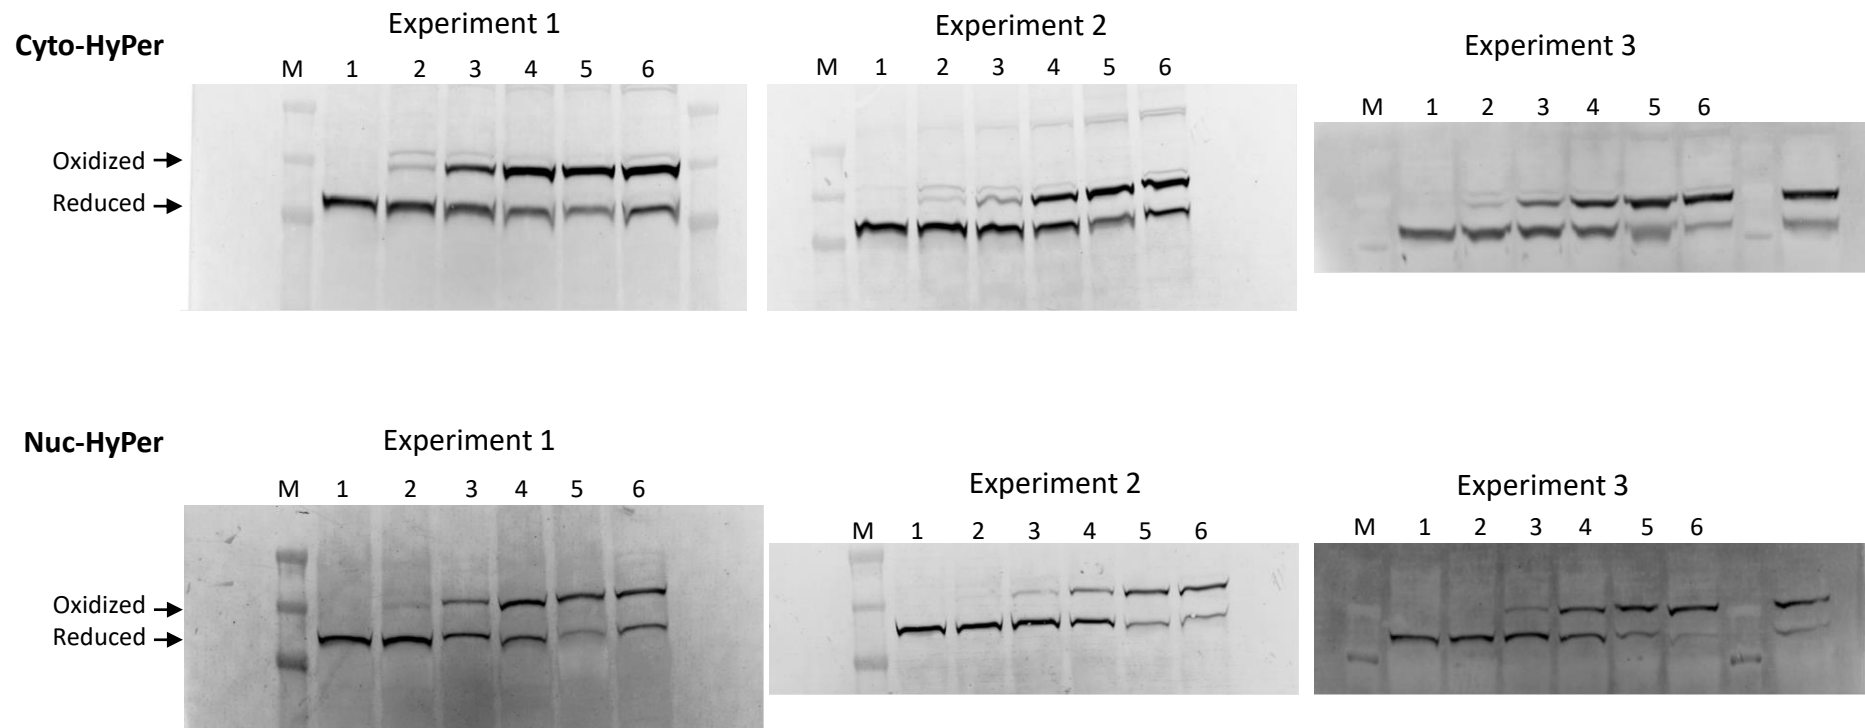

**Figure S2.** Redox state of cyto- and nuc-HyPer sensors in MDA-MB-231 cells as given in main Figure 3B. Original blots/gels of three experiments are presented. M: Marker; 1. NT (non-treated); 2. AUF 6  $\mu$ M, 15 min; 3. AUF 6  $\mu$ M, 30 min; 4. AUF 6  $\mu$ M, 1 h; 5. AUF 6  $\mu$ M, 4 h; 6. H<sub>2</sub>O<sub>2</sub> positive control.
