# Supplementary material for: Novel Insights into Redox-Based Mechanisms for Auranofin-Induced Rapid Cancer Cell Death
Source: MDPI journal article supplement (doi:10.3390/cancers14194864), 2022-10-05
Supplement: s1 [file Figure S3.pdf › Figure S3.pdf]

BrdU for 1 h → AUF treatment → Recovery → PI staining → Flow cytometry

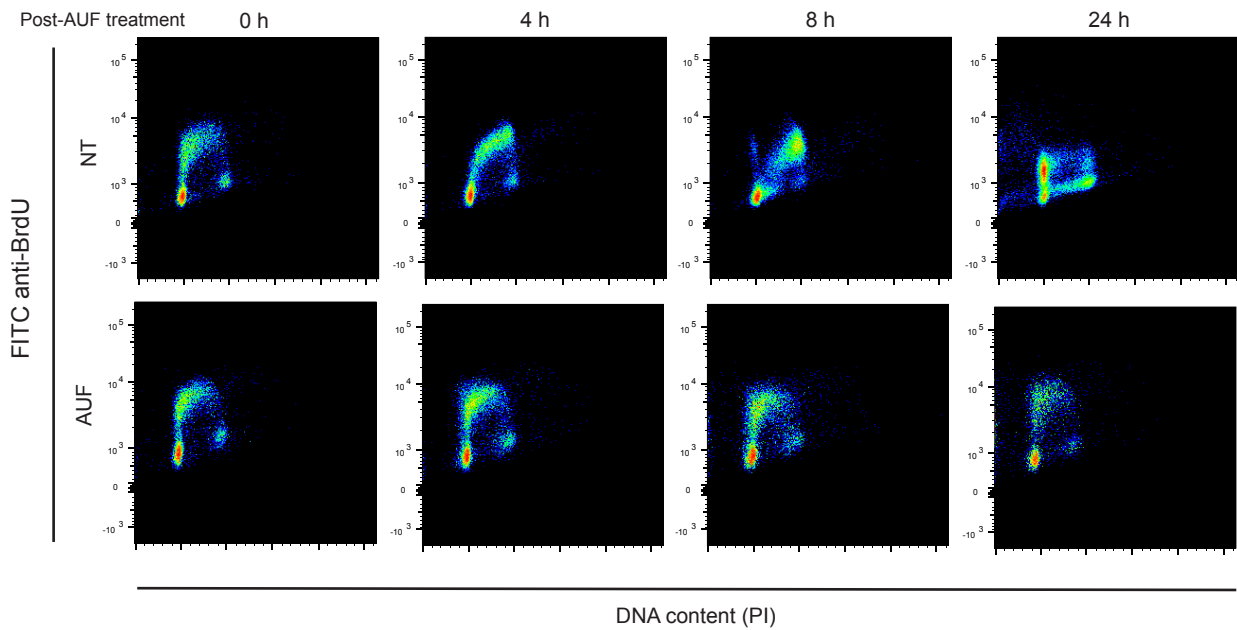

**Figure S3.** Effect of AUF on cell cycle. MDA-MB-231 cells were labeled with BrdU for 1 h and then subjected to two conditions for 30 min: non-treated (NT) or treated with 6  $\mu$ M AUF. After a defined recovery time in growth media (0, 4, 8, or 24 h), cells were removed and proceeded for PI staining and flow cytometry. Representative graphs of two experiments are shown.
