# Supplementary material for: Novel Insights into Redox-Based Mechanisms for Auranofin-Induced Rapid Cancer Cell Death
Source: MDPI journal article supplement (doi:10.3390/cancers14194864), 2022-10-05
Supplement: s1 [file Figure S4.pdf › Figure S4.pdf]

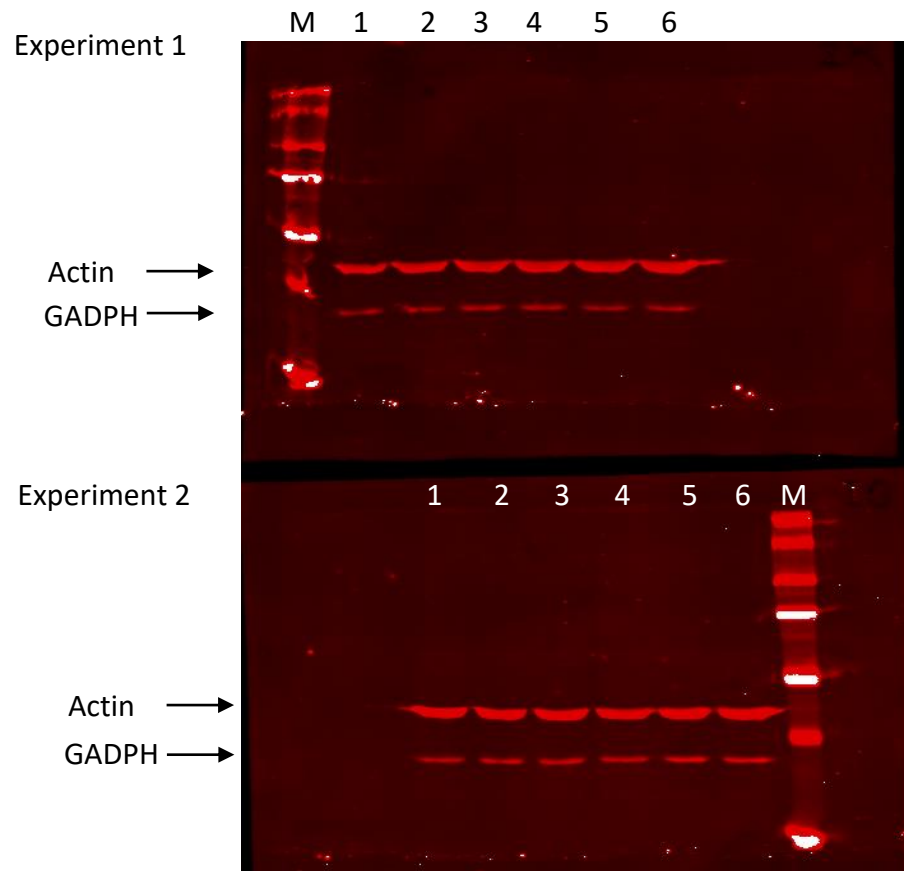

**Figure S4.** Immunoblot of actin of MDA-MB-231 cells treated with indicated conditions as given in main Figure 6C. Original blots/gels of two experiments are presented. M: Marker; 1. NT (non-treated); 2. AUF 6  $\mu$ M, 30 min; 3. AUF 6  $\mu$ M, 1 h; 4. AUF 6  $\mu$ M, 2 h; 5. AUF 6  $\mu$ M, 3 h; 6. AUF 6  $\mu$ M, 4 h.
