# Supplementary material for: Novel Insights into Redox-Based Mechanisms for Auranofin-Induced Rapid Cancer Cell Death
Source: MDPI journal article supplement (doi:10.3390/cancers14194864), 2022-10-05
Supplement: s1 [file Table S1.pdf › Table S1.pdf]

**Table S1.** List of the differentially oxidized cysteine-containing proteins in MDA-MB-231 cells upon 6  $\mu$ M AUF treatment for 30 min

| 161 proteins<br>accession | Anova ( <i>p</i> value) |          | Fold change (ratio)* |               | Highest<br>mean<br>condition | Lowest<br>mean<br>condition | Gene            |
|---------------------------|-------------------------|----------|----------------------|---------------|------------------------------|-----------------------------|-----------------|
|                           | Exp1                    | Exp2     | Exp1                 | Exp2          |                              |                             |                 |
| Q9UMR2                    | 2.03E-05                | 8.54E-04 | <b>2.327</b>         | <b>2.432</b>  | AUF                          | NT                          | <b>DDX19B</b>   |
| Q5BKZ1                    | 2.30E-05                | 3.87E-04 | <b>2.302</b>         | <b>1.797</b>  | AUF                          | NT                          | <b>ZNF326</b>   |
| Q9NSB4                    | 1.28E-04                | 1.76E-02 | <b>8.168</b>         | <b>40.143</b> | AUF                          | NT                          | <b>EIF2B3</b>   |
| Q8NB7                     | 1.80E-04                | 1.41E-02 | <b>-1.679</b>        | <b>-1.318</b> | NT                           | AUF                         | <b>SUMF2</b>    |
| P51858                    | 2.28E-04                | 1.23E-03 | <b>-13.415</b>       | <b>-5.979</b> | NT                           | AUF                         | <b>HDGF</b>     |
| Q15436                    | 2.46E-04                | 2.25E-02 | <b>1.524</b>         | <b>1.455</b>  | AUF                          | NT                          | <b>SEC23A</b>   |
| Q9NU22                    | 2.50E-04                | 6.13E-05 | <b>3.525</b>         | <b>2.363</b>  | AUF                          | NT                          | <b>MDN1</b>     |
| P31151                    | 2.81E-04                | 1.24E-02 | <b>1.978</b>         | <b>4.300</b>  | AUF                          | NT                          | <b>S100A7</b>   |
| P50453                    | 4.25E-04                | 3.38E-03 | <b>3.407</b>         | <b>1.592</b>  | AUF                          | NT                          | <b>SERPINB9</b> |
| O60610                    | 4.58E-04                | 1.21E-02 | <b>-4.444</b>        | <b>-1.755</b> | NT                           | AUF                         | <b>DIAPH1</b>   |
| P13489                    | 6.33E-04                | 6.98E-03 | <b>2.934</b>         | <b>1.778</b>  | AUF                          | NT                          | <b>RNH1</b>     |
| Q14566                    | 6.44E-04                | 1.16E-03 | <b>1.607</b>         | <b>1.555</b>  | AUF                          | NT                          | <b>MCM6</b>     |
| P17980                    | 7.56E-04                | 1.36E-02 | <b>2.329</b>         | <b>1.533</b>  | AUF                          | NT                          | <b>PSMC3</b>    |
| P10599                    | 7.56E-04                | 9.71E-03 | <b>2.732</b>         | <b>1.843</b>  | AUF                          | NT                          | <b>TXN</b>      |
| Q14847                    | 7.99E-04                | 2.09E-03 | <b>2.267</b>         | <b>1.898</b>  | AUF                          | NT                          | <b>LASP1</b>    |
| P05455                    | 7.99E-04                | 2.05E-02 | <b>-2.399</b>        | <b>-1.567</b> | NT                           | AUF                         | <b>SSB</b>      |
| Q00610                    | 8.31E-04                | 1.88E-03 | <b>2.149</b>         | <b>2.309</b>  | AUF                          | NT                          | <b>CLTC</b>     |
| Q15019                    | 8.35E-04                | 1.10E-02 | <b>4.045</b>         | <b>1.888</b>  | AUF                          | NT                          | <b>SEPT2</b>    |
| P06748                    | 8.43E-04                | 2.07E-02 | <b>-1.826</b>        | <b>-2.106</b> | NT                           | AUF                         | <b>NPM1</b>     |
| O00299                    | 8.74E-04                | 4.13E-03 | <b>1.695</b>         | <b>2.071</b>  | AUF                          | NT                          | <b>CLIC1</b>    |
| Q96DI7                    | 8.96E-04                | 4.46E-03 | <b>2.352</b>         | <b>1.816</b>  | AUF                          | NT                          | <b>SNRNP40</b>  |
| P07355                    | 9.58E-04                | 2.60E-03 | <b>1.720</b>         | <b>1.543</b>  | AUF                          | NT                          | <b>ANXA2</b>    |
| P07477                    | 1.22E-03                | 3.30E-04 | <b>3.227</b>         | <b>2.684</b>  | AUF                          | NT                          | <b>PRSS1</b>    |
| P46782                    | 1.23E-03                | 9.73E-03 | <b>1.951</b>         | <b>1.596</b>  | AUF                          | NT                          | <b>RPS5</b>     |
| Q9NX58                    | 1.46E-03                | 3.44E-03 | <b>2.074</b>         | <b>1.940</b>  | AUF                          | NT                          | <b>LYAR</b>     |
| P46063                    | 1.53E-03                | 2.15E-03 | <b>2.171</b>         | <b>1.373</b>  | AUF                          | NT                          | <b>RECQL</b>    |
| Q13177                    | 1.54E-03                | 2.02E-03 | <b>3.374</b>         | <b>2.654</b>  | AUF                          | NT                          | <b>PAK2</b>     |
| P50454                    | 1.68E-03                | 1.86E-03 | <b>-1.515</b>        | <b>-2.845</b> | NT                           | AUF                         | <b>SERPINH1</b> |
| P25774                    | 1.71E-03                | 4.75E-02 | <b>1.921</b>         | <b>1.592</b>  | AUF                          | NT                          | <b>CTSS</b>     |
| P61160                    | 1.80E-03                | 1.55E-03 | <b>1.847</b>         | <b>1.404</b>  | AUF                          | NT                          | <b>ACTR2</b>    |
| P23284                    | 1.84E-03                | 2.82E-02 | <b>1.917</b>         | <b>1.795</b>  | AUF                          | NT                          | <b>PPIB</b>     |
| Q92747                    | 1.88E-03                | 2.48E-02 | <b>2.403</b>         | <b>1.735</b>  | AUF                          | NT                          | <b>ARPC1A</b>   |
| P60510                    | 1.99E-03                | 1.55E-02 | <b>1.886</b>         | <b>1.262</b>  | AUF                          | NT                          | <b>PPP4C</b>    |
| Q99447                    | 2.03E-03                | 1.74E-02 | <b>1.799</b>         | <b>1.302</b>  | AUF                          | NT                          | <b>PCYT2</b>    |
| P30479                    | 2.17E-03                | 3.97E-03 | <b>-1.289</b>        | <b>-1.620</b> | NT                           | AUF                         | <b>HLA-B</b>    |
| P13646                    | 2.21E-03                | 5.42E-05 | <b>2.330</b>         | <b>6.467</b>  | AUF                          | NT                          | <b>KRT13</b>    |
| P78417                    | 2.27E-03                | 3.83E-03 | <b>1.750</b>         | <b>1.777</b>  | AUF                          | NT                          | <b>GSTO1</b>    |
| Q9UBQ5                    | 2.54E-03                | 5.93E-03 | <b>1.618</b>         | <b>1.489</b>  | AUF                          | NT                          | <b>EIF3K</b>    |
| Q6XZF7                    | 2.65E-03                | 1.13E-03 | <b>2.184</b>         | <b>2.139</b>  | AUF                          | NT                          | <b>DNMBP</b>    |
| P51149                    | 2.66E-03                | 2.96E-02 | <b>1.750</b>         | <b>1.528</b>  | AUF                          | NT                          | <b>RAB7A</b>    |
| P54577                    | 2.72E-03                | 3.89E-02 | <b>1.586</b>         | <b>1.448</b>  | AUF                          | NT                          | <b>YARS</b>     |
| P62979                    | 2.73E-03                | 5.54E-03 | <b>2.073</b>         | <b>2.120</b>  | AUF                          | NT                          | <b>RPS27A</b>   |
| P14314                    | 2.74E-03                | 4.98E-02 | <b>-1.925</b>        | <b>-1.279</b> | NT                           | AUF                         | <b>PRKCSH</b>   |
| O94804                    | 2.84E-03                | 6.31E-04 | <b>-5.098</b>        | <b>-2.380</b> | NT                           | AUF                         | <b>STK10</b>    |
| Q01970                    | 3.02E-03                | 2.32E-02 | <b>-2.078</b>        | <b>-1.415</b> | NT                           | AUF                         | <b>PLCB3</b>    |
| P23526                    | 3.09E-03                | 3.74E-02 | <b>1.725</b>         | <b>1.482</b>  | AUF                          | NT                          | <b>AHCY</b>     |
| O43681                    | 3.26E-03                | 4.64E-03 | <b>2.266</b>         | <b>1.816</b>  | AUF                          | NT                          | <b>ASNA1</b>    |
| P14373                    | 3.41E-03                | 2.23E-02 | <b>1.874</b>         | <b>1.851</b>  | AUF                          | NT                          | <b>TRIM27</b>   |

|        |          |          |        |        |     |     |          |
|--------|----------|----------|--------|--------|-----|-----|----------|
| O76031 | 3.41E-03 | 2.48E-05 | 1.759  | 1.759  | AUF | NT  | CLPX     |
| Q99575 | 3.59E-03 | 1.24E-02 | -1.386 | -2.050 | NT  | AUF | POP1     |
| P56537 | 3.59E-03 | 2.20E-02 | 1.794  | 1.474  | AUF | NT  | EIF6     |
| Q16181 | 3.59E-03 | 6.08E-03 | 1.629  | 1.569  | AUF | NT  | SEPT7    |
| Q9Y5B8 | 3.79E-03 | 1.13E-02 | 2.716  | 1.600  | AUF | NT  | NME7     |
| Q5THJ4 | 3.84E-03 | 5.79E-04 | 5.071  | 3.172  | AUF | NT  | VPS13D   |
| O96013 | 4.13E-03 | 7.36E-03 | -1.836 | -2.052 | NT  | AUF | PAK4     |
| Q96HE7 | 4.43E-03 | 8.03E-04 | -1.756 | -1.706 | NT  | AUF | ERO1L    |
| Q12849 | 4.44E-03 | 2.62E-03 | 2.046  | 1.940  | AUF | NT  | GRSF1    |
| Q9NUQ8 | 4.46E-03 | 3.03E-02 | 1.910  | 1.577  | AUF | NT  | ABCF3    |
| O14929 | 4.51E-03 | 1.45E-02 | 2.909  | 2.186  | AUF | NT  | HAT1     |
| Q96FS4 | 4.71E-03 | 9.07E-03 | -1.958 | -2.131 | NT  | AUF | SIPA1    |
| Q10713 | 4.74E-03 | 2.72E-02 | 2.098  | 1.330  | AUF | NT  | PMPCA    |
| Q12899 | 4.90E-03 | 1.20E-02 | 4.545  | 1.988  | AUF | NT  | TRIM26   |
| O15231 | 5.06E-03 | 2.39E-03 | 1.792  | 1.570  | AUF | NT  | ZNF185   |
| Q9UBE0 | 5.10E-03 | 3.13E-02 | 1.629  | 1.335  | AUF | NT  | SAE1     |
| Q13148 | 5.19E-03 | 5.56E-04 | 1.815  | 1.708  | AUF | NT  | TARDBP   |
| Q96CV9 | 5.30E-03 | 2.66E-02 | 2.427  | 1.529  | AUF | NT  | OPTN     |
| P62805 | 5.31E-03 | 4.40E-03 | 2.019  | 2.287  | AUF | NT  | HISTIH4A |
| Q14527 | 5.42E-03 | 5.00E-04 | -3.178 | -6.397 | NT  | AUF | HLTF     |
| P21266 | 5.47E-03 | 3.89E-02 | 3.035  | 1.436  | AUF | NT  | GSTM3    |
| P49368 | 5.58E-03 | 3.06E-02 | 1.701  | 1.400  | AUF | NT  | CCT3     |
| Q96CS3 | 5.59E-03 | 1.46E-02 | -1.616 | -1.498 | NT  | AUF | FAF2     |
| P06753 | 5.68E-03 | 6.34E-03 | 1.570  | 1.758  | AUF | NT  | TPM3     |
| Q15031 | 6.41E-03 | 4.02E-03 | -1.757 | -2.293 | NT  | AUF | LARS2    |
| P62857 | 6.56E-03 | 3.87E-03 | 2.977  | 3.442  | AUF | NT  | RPS28    |
| P04637 | 6.64E-03 | 1.31E-02 | 1.881  | 1.527  | AUF | NT  | TP53     |
| P06733 | 6.92E-03 | 9.66E-03 | 1.516  | 1.625  | AUF | NT  | ENO1     |
| P98175 | 7.37E-03 | 1.55E-02 | 1.410  | 1.629  | AUF | NT  | RBM10    |
| P50990 | 7.41E-03 | 2.03E-02 | 2.009  | 1.353  | AUF | NT  | CCT8     |
| Q92615 | 7.79E-03 | 1.47E-03 | 1.876  | 2.453  | AUF | NT  | LARP4B   |
| P46821 | 8.00E-03 | 9.53E-03 | -1.580 | -1.488 | NT  | AUF | MAP1B    |
| P41214 | 8.29E-03 | 2.73E-03 | 3.158  | 1.996  | AUF | NT  | EIF2D    |
| Q9NVC6 | 8.65E-03 | 4.75E-02 | 1.559  | 1.285  | AUF | NT  | MED17    |
| Q9NSV4 | 8.67E-03 | 8.06E-03 | -2.292 | -1.741 | NT  | AUF | DIAPH3   |
| P09104 | 8.76E-03 | 1.95E-04 | 1.784  | 1.527  | AUF | NT  | ENO2     |
| Q08AE8 | 8.85E-03 | 1.40E-03 | 1.190  | 2.225  | AUF | NT  | SPIRE1   |
| P62826 | 8.89E-03 | 3.29E-03 | 1.599  | 1.988  | AUF | NT  | RAN      |
| Q16222 | 8.90E-03 | 1.63E-02 | 1.878  | 1.534  | AUF | NT  | UAP1     |
| Q9HAU5 | 9.43E-03 | 3.52E-02 | -2.190 | -2.791 | NT  | AUF | UPF2     |
| Q13509 | 9.59E-03 | 1.71E-02 | -1.464 | -1.304 | NT  | AUF | TUBB3    |
| P63010 | 1.06E-02 | 2.90E-03 | -1.376 | -1.851 | NT  | AUF | AP2B1    |
| Q9H2D6 | 1.06E-02 | 1.26E-03 | 1.480  | 1.519  | AUF | NT  | TRIOBP   |
| Q06830 | 1.11E-02 | 2.82E-03 | 1.320  | 1.529  | AUF | NT  | PRDX1    |
| P13647 | 1.14E-02 | 2.75E-03 | 1.121  | 2.183  | AUF | NT  | KRT5     |
| Q9BWF3 | 1.15E-02 | 5.31E-04 | 1.180  | 4.490  | AUF | NT  | RBM4     |
| P20839 | 1.15E-02 | 3.42E-02 | 3.489  | 3.918  | AUF | NT  | IMPDH1   |
| P01040 | 1.24E-02 | 8.54E-03 | 2.135  | 2.534  | AUF | NT  | CSTA     |
| P13674 | 1.24E-02 | 1.15E-03 | -1.740 | -2.165 | NT  | AUF | P4HA1    |
| Q7Z3B3 | 1.29E-02 | 1.44E-02 | -1.926 | -1.923 | NT  | AUF | KANSL1   |
| P27824 | 1.30E-02 | 9.67E-03 | -1.686 | -1.350 | NT  | AUF | CANX     |
| P02788 | 1.43E-02 | 3.58E-03 | 1.601  | 1.768  | AUF | NT  | LTF      |
| O96008 | 1.47E-02 | 8.49E-04 | 1.480  | 1.516  | AUF | NT  | TOMM40   |
| P20339 | 1.50E-02 | 1.54E-03 | 2.633  | 2.028  | AUF | NT  | RAB5A    |
| P12429 | 1.52E-02 | 2.21E-02 | 2.103  | 1.425  | AUF | NT  | ANXA3    |
| Q9NVA2 | 1.57E-02 | 1.15E-02 | 1.545  | 1.380  | AUF | NT  | SEPT11   |
| P29401 | 1.61E-02 | 1.33E-02 | 1.603  | 1.443  | AUF | NT  | TKT      |

|        |          |          |        |        |     |     |                  |
|--------|----------|----------|--------|--------|-----|-----|------------------|
| Q99496 | 1.63E-02 | 1.98E-02 | 1.990  | 1.923  | AUF | NT  | <i>RNF2</i>      |
| P62913 | 1.63E-02 | 2.99E-03 | 1.784  | 1.660  | AUF | NT  | <i>RPL11</i>     |
| Q9Y6K9 | 1.70E-02 | 3.17E-02 | 2.106  | 1.654  | AUF | NT  | <i>IKBK</i>      |
| P22061 | 1.74E-02 | 3.43E-03 | 1.686  | 2.136  | AUF | NT  | <i>PCMT1</i>     |
| Q9UK59 | 1.77E-02 | 3.34E-02 | 2.165  | 2.381  | AUF | NT  | <i>DBR1</i>      |
| P84022 | 1.78E-02 | 2.60E-03 | -3.095 | -3.163 | NT  | AUF | <i>SMAD3</i>     |
| Q9Y2K7 | 1.81E-02 | 2.83E-03 | 1.666  | 1.783  | AUF | NT  | <i>KDM2A</i>     |
| Q9ULD4 | 1.82E-02 | 9.71E-03 | -1.682 | -2.327 | NT  | AUF | <i>BRPF3</i>     |
| Q9BTX1 | 1.83E-02 | 4.42E-03 | -1.703 | -1.849 | NT  | AUF | <i>NDC1</i>      |
| P27816 | 1.85E-02 | 5.04E-03 | -1.629 | -1.590 | NT  | AUF | <i>MAP4</i>      |
| Q9ULC5 | 1.87E-02 | 3.15E-03 | 1.617  | 1.415  | AUF | NT  | <i>ACSL5</i>     |
| P28072 | 1.87E-02 | 5.40E-03 | 1.636  | 2.021  | AUF | NT  | <i>PSMB6</i>     |
| P23919 | 1.96E-02 | 2.77E-02 | 1.812  | 1.630  | AUF | NT  | <i>DTYMK</i>     |
| P00338 | 2.03E-02 | 2.94E-03 | 1.538  | 1.630  | AUF | NT  | <i>LDHA</i>      |
| Q14202 | 2.06E-02 | 2.23E-02 | -2.560 | -1.560 | NT  | AUF | <i>ZMYM3</i>     |
| P02462 | 2.13E-02 | 1.38E-03 | 14.698 | 4.115  | AUF | NT  | <i>COL4A1</i>    |
| O15269 | 2.24E-02 | 8.27E-03 | 1.852  | 1.590  | AUF | NT  | <i>SPTLC1</i>    |
| P49711 | 2.37E-02 | 1.46E-02 | -1.859 | -2.128 | NT  | AUF | <i>CTCF</i>      |
| P16152 | 2.37E-02 | 2.42E-02 | 1.553  | 1.823  | AUF | NT  | <i>CBR1</i>      |
| P17301 | 2.43E-02 | 3.72E-02 | -1.334 | -1.540 | NT  | AUF | <i>ITGA2</i>     |
| Q15323 | 2.58E-02 | 4.10E-04 | 1.832  | 5.191  | AUF | NT  | <i>KRT31</i>     |
| P51532 | 2.62E-02 | 1.65E-02 | 1.559  | 1.567  | AUF | NT  | <i>SMARCA4</i>   |
| Q99729 | 2.64E-02 | 3.11E-02 | -1.411 | -1.691 | NT  | AUF | <i>HNRNPAB</i>   |
| O60701 | 2.65E-02 | 7.60E-03 | 1.713  | 1.414  | AUF | NT  | <i>UGDH</i>      |
| O94851 | 2.69E-02 | 4.98E-02 | -1.690 | -1.317 | NT  | AUF | <i>MICAL2</i>    |
| Q13586 | 2.72E-02 | 3.92E-02 | -1.754 | -1.263 | NT  | AUF | <i>STIMI</i>     |
| Q96RS6 | 2.78E-02 | 2.59E-02 | 1.292  | 1.512  | AUF | NT  | <i>NUDCD1</i>    |
| P63104 | 2.87E-02 | 2.35E-02 | 1.402  | 1.671  | AUF | NT  | <i>YWHAZ</i>     |
| P48637 | 2.89E-02 | 2.31E-02 | 2.524  | 2.047  | AUF | NT  | <i>GSS</i>       |
| Q9BVK6 | 3.02E-02 | 1.83E-03 | -1.591 | -2.811 | NT  | AUF | <i>TMED9</i>     |
| Q9UDY2 | 3.02E-02 | 2.00E-02 | -1.497 | -1.614 | NT  | AUF | <i>TJP2</i>      |
| P78386 | 3.06E-02 | 7.24E-04 | 3.771  | 8.792  | AUF | NT  | <i>KRT85</i>     |
| P04083 | 3.10E-02 | 2.40E-02 | 2.263  | 2.294  | AUF | NT  | <i>ANXA1</i>     |
| P08133 | 3.14E-02 | 4.36E-02 | 1.993  | 1.401  | AUF | NT  | <i>ANXA6</i>     |
| O14818 | 3.18E-02 | 3.37E-02 | 1.709  | 1.563  | AUF | NT  | <i>PSMA7</i>     |
| P68036 | 3.19E-02 | 8.71E-03 | -2.220 | -2.014 | NT  | AUF | <i>UBE2L3</i>    |
| Q9UBT2 | 3.29E-02 | 2.09E-02 | 2.008  | 1.455  | AUF | NT  | <i>UBA2</i>      |
| O14763 | 3.40E-02 | 2.61E-04 | -2.155 | -6.847 | NT  | AUF | <i>TNFRSF10B</i> |
| Q9Y4K0 | 3.43E-02 | 2.31E-02 | -2.574 | -4.551 | NT  | AUF | <i>LOXL2</i>     |
| P00558 | 3.45E-02 | 1.66E-02 | 1.392  | 1.574  | AUF | NT  | <i>PGK1</i>      |
| P04150 | 3.56E-02 | 3.29E-02 | 1.562  | 1.619  | AUF | NT  | <i>NR3C1</i>     |
| Q9BRX2 | 3.70E-02 | 1.10E-02 | 1.415  | 1.789  | AUF | NT  | <i>PELO</i>      |
| Q92945 | 3.77E-02 | 7.05E-04 | 1.381  | 1.800  | AUF | NT  | <i>KHSRP</i>     |
| Q8WTT2 | 3.79E-02 | 4.07E-02 | -1.671 | -2.468 | NT  | AUF | <i>NOC3L</i>     |
| Q8TDD1 | 3.87E-02 | 2.09E-03 | -1.496 | -2.529 | NT  | AUF | <i>DDX54</i>     |
| Q9Y3F4 | 3.89E-02 | 1.35E-02 | 1.638  | 1.431  | AUF | NT  | <i>STRAP</i>     |
| Q9ULA0 | 3.92E-02 | 1.35E-02 | 1.543  | 1.861  | AUF | NT  | <i>DNPEP</i>     |
| O43663 | 4.01E-02 | 2.01E-02 | -2.300 | -1.669 | NT  | AUF | <i>PRC1</i>      |
| P02545 | 4.22E-02 | 1.42E-02 | 1.578  | 1.624  | AUF | NT  | <i>LMNA</i>      |
| Q9NRG4 | 4.32E-02 | 1.73E-02 | 1.928  | 1.712  | AUF | NT  | <i>SMYD2</i>     |
| Q99836 | 4.33E-02 | 2.85E-04 | 4.445  | 3.573  | AUF | NT  | <i>MYD88</i>     |
| Q9BQ67 | 4.53E-02 | 8.40E-04 | -1.621 | -2.044 | NT  | AUF | <i>GRWD1</i>     |
| Q6ZRP7 | 4.72E-02 | 2.21E-02 | -1.876 | -2.445 | NT  | AUF | <i>QSOX2</i>     |
| P49023 | 4.78E-02 | 5.84E-04 | -3.003 | -8.674 | NT  | AUF | <i>PXN</i>       |
| P28340 | 4.90E-02 | 1.44E-03 | -1.413 | -2.620 | NT  | AUF | <i>POLD1</i>     |
| P05556 | 4.97E-02 | 1.02E-02 | -1.286 | -1.967 | NT  | AUF | <i>ITGB1</i>     |

The oxidized proteome of cysteine-containing proteins after 6  $\mu$ M AUF treatment for 30 min in MDA-MB-231 cells were analyzed by mass spectrometry. 161 differentially oxidized proteins with a  $p$  value  $< 0.05$  and a fold change (ratio) over 1.5 between non-treated (NT) and AUF-treated cells in at least one of the two biological experiments (Exp1 and Exp2) were identified. The fold change (ratio) was considered positive when the oxidized protein quantity was found higher in AUF-treated cells (highest mean condition: AUF) and negative when the oxidized protein quantity was found higher in non-treated cells (highest mean condition: NT).
